# Supplementary material for: Endothelin-1 (ET-1) Increases the Expression of Remodeling Genes in Vascular Smooth Muscle through Linked Calcium and cAMP Pathways: ROLE OF A PHOSPHOLIPASE A2(cPLA2)/CYCLOOXYGENASE-2 (COX-2)/PROSTACYCLIN RECEPTOR-DEPENDENT AUTOCRINE LOOP
Source: PubMed Central journal article supplement — J Biol Chem. 2010 May 7;285(34):25913–27. doi: 10.1074/jbc.M110.139485 (PMC2923981; doi:10.1074/jbc.m110.139485), 2010-05-07
Supplement: supp_M110.139485_jbc.M110.139485-1.pdf [file supp_M110.139485_jbc.M110.139485-1.pdf]

## SUPPLEMENTAL DATA

### siRNA validation of PTGIR and COX-2 inhibition

Human pulmonary artery smooth muscle cells (Lonza, UK), passage 6, were grown to 50% confluence on a 24 well plate in smooth muscle basal media (SMBM) (Lonza, UK) at 37°C, 5% CO<sub>2</sub> with 100% humidity. On the day of siRNA transfection the culture volume was reduced to 100µl per well and the transfection mix of 6.6µl of HiPerFect (Qiagen, Hilden, Germany) and 10nM siRNA (Qiagen, Hilden, Germany) in 100µl of DMEM (serum free, phenol red free)(Sigma Aldrich, Poole, UK) was incubated for 30 minutes at room temperature prior to transfection. 3 hrs after transfection the culture volume was increased to a total of 500ul with complete SMBM. Transfections were incubated for 72hrs prior to assay. SMBM media was replaced with serum free media 24hrs before assay. Transfections were conducted in triplicate for each time point. Endothelin-1 (Calbiochem, Nottingham, UK) was added for 0hrs and 2hrs at a final concentration of 1x10<sup>-8</sup>M. Time points were terminated with a single wash of phosphate buffered saline, total RNA extracted and RT-QPCR performed for each target gene as detailed in the Materials and Methods section. All measurements represent the mean +/- SEM of 3 independent experiments.

### siRNA for PTGIR (IP-receptor)

All siRNA were purchased from Qiagen (Hilden, Germany) in the Flexitube, 1nM, format. siRNA were reconstituted according to the manufacturers protocol.

| Target gene | Assay name    | product name  | Catalogue number |
|-------------|---------------|---------------|------------------|
| IP receptor | PTGIR siRNA 1 | Hs_PTGIR_1 HP | SI00019250       |
| COX-2       | COX2 siRNA    | Hs_PTGS2_1 HP | SI00019334       |

### Supplemental Figure legends/results;

**IP-receptor siRNA (PTGIR1) reduced ET-1 induced gene expression for IP dependent genes but not for ET-1 dependent genes in response to ET-1.** PTGIR siRNA reduce the accumulation of IP-receptor (PTGIR) after 72 hrs in HPASMC (Supplemental Figure 1 A). PTGIR siRNA reduces the accumulation of amphiregulin (Supplemental Figure 1 B), inhibin-beta-A (Supplemental Figure 1 C), epiregulin (Supplemental Figure 1 D) and follistatin (Supplemental Figure 1 E) post ET-1 treatment of HPASMC for 2 hours. PTGIR siRNA transfection for 72hr does not reduce the accumulation of COX-2 (Supplemental Figure 1 F), HBEGF (Supplemental Figure 1 G), CYR61 (Supplemental Figure 1 H) mRNA, in response to ET-1 for 2 hrs.

Supplemental data figure 1

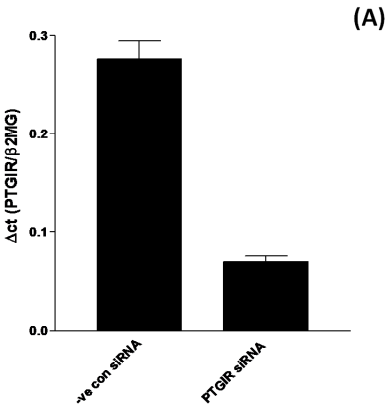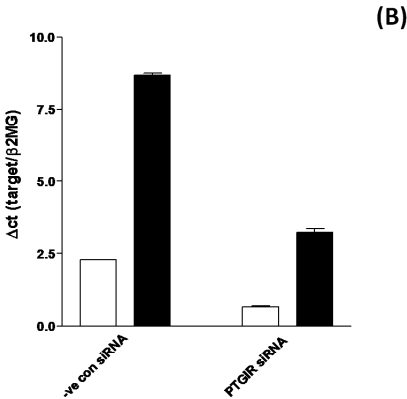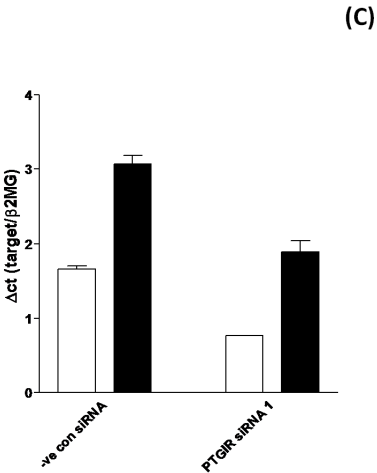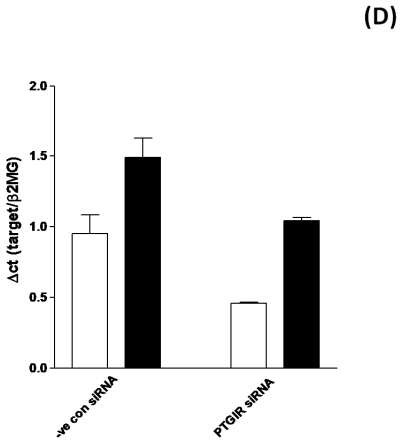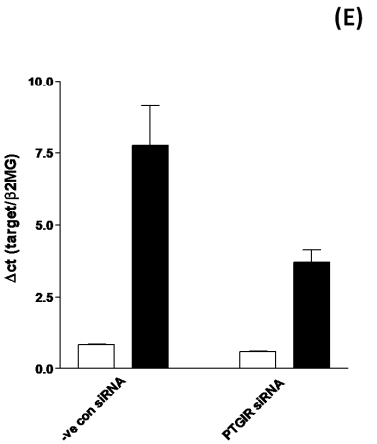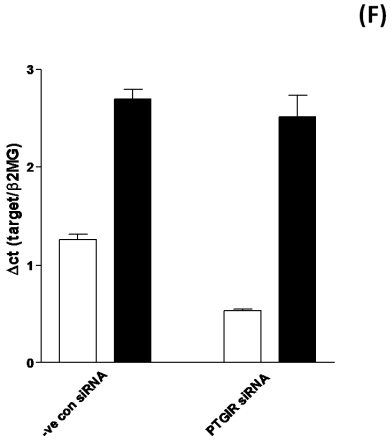

Supplemental data figure 1

(G)

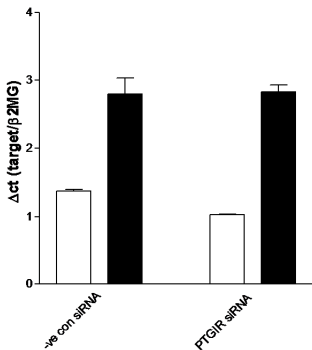

(H)

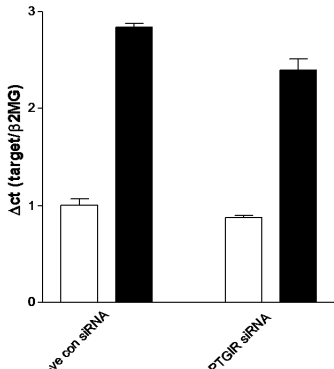

**SUPPLEMENTARY DATA;**

**Table 1**

| <b>INHIBITOR/<br/>ANTAGONIST</b> | <b>TARGET</b>                                                                   | <b>Target agonist or<br/>function</b>   | <b>REFERENCE</b> |
|----------------------------------|---------------------------------------------------------------------------------|-----------------------------------------|------------------|
| <b>BQ123</b>                     | ET <sub>a</sub> , G-protein coupled receptor                                    | ET-1                                    | (1)              |
| <b>BQ788</b>                     | ET <sub>b</sub> , G-protein coupled receptor                                    | ET-1                                    | (2)              |
| <b>Bosentan</b>                  | ET <sub>a</sub> and ET <sub>b</sub> G- protein coupled receptort                | ET-1                                    | (3)              |
| <b>NS398</b>                     | Cyclooxygenase -2                                                               | Eicsoaniod synthesis                    | (4)              |
| <b>Indomethacin</b>              | Cyclooxygenase -1 and 2                                                         | Eicsoaniod synthesis                    | (5)              |
| <b>cPLA2-I</b>                   | Phospholipase A <sub>2</sub> (inhibitor)                                        | Arachidonate release from phospholipids | (6)              |
| <b>RO3244794</b>                 | IP, G-Protein coupled receptor                                                  | PGI <sub>2</sub>                        | (7)              |
| <b>AH6809</b>                    | EP <sub>1</sub> and EP <sub>2</sub> , G-protein coupled receptor                | PGE <sub>2</sub>                        | (8)              |
| <b>L161982</b>                   | EP <sub>4</sub> , G-protein coupled receptor                                    | PGE <sub>2</sub>                        | (9)              |
| <b>EGTA</b>                      | Calcium /magnesium ( non cell permanent chelator)                               |                                         |                  |
| <b>BAPTA-AM</b>                  | Intracellular calcium (chelator)                                                |                                         | (10)             |
| <b>Nicardipine</b>               | L-type voltage-gated calcium channels                                           | Voltage gated calcium cell entry        | (11)             |
| <b>U73122</b>                    | Phospholipase -C                                                                | Cleavage of phospholipids to DAG/IP3    | (12)             |
| <b>ω-agatoxin-IVA</b>            | P and N-type voltage operated calcium channel inhibitor ( at micromolar levels) | Voltage gated calcium cell entry        | (13)             |
| <b>ω-conotoxin-MV1C</b>          | N/P/Q type voltage operated calcium channel inhibitor.                          | Voltage gated calcium cell entry        | (14)             |
| <b>ω-conotoxin-GVIA</b>          | N-type voltage operated calcium channel inhibitor                               | Voltage gated calcium cell entry        | (15)             |
| <b>Mibefradil</b>                | L-type and T-type voltage gated calcium channel inhibitor                       | Voltage gated calcium cell entry        | (16)             |

1. Ihara, M., Ishikawa, K., Fukuroda, T., Saeki, T., Funabashi, K., Fukami, T., Suda, H., and Yano, M. (1992) *J Cardiovasc Pharmacol* **20 Suppl 12**, S11-14

2. Ishikawa, K., Ihara, M., Noguchi, K., Mase, T., Mino, N., Saeki, T., Fukuroda, T., Fukami, T., Ozaki, S., Nagase, T., and et al. (1994) *Proc Natl Acad Sci U S A* **91**, 4892-4896
3. Clozel, M., Breu, V., Gray, G. A., Kalina, B., Loffler, B. M., Burri, K., Cassal, J. M., Hirth, G., Muller, M., Neidhart, W., and et al. (1994) *J Pharmacol Exp Ther* **270**, 228-235
4. Futaki, N., Takahashi, S., Yokoyama, M., Arai, I., Higuchi, S., and Otomo, S. (1994) *Prostaglandins* **47**, 55-59
5. Mitchell, J. A., Akarasereenont, P., Thiemermann, C., Flower, R. J., and Vane, J. R. (1993) *Proc Natl Acad Sci U S A* **90**, 11693-11697
6. Seno, K., Okuno, T., Nishi, K., Murakami, Y., Watanabe, F., Matsuura, T., Wada, M., Fujii, Y., Yamada, M., Ogawa, T., Okada, T., Hashizume, H., Kii, M., Hara, S., Hagishita, S., Nakamoto, S., Yamada, K., Chikazawa, Y., Ueno, M., Teshirogi, I., Ono, T., and Ohtani, M. (2000) *J Med Chem* **43**, 1041-1044
7. Bley, K. R., Bhattacharya, A., Daniels, D. V., Gever, J., Jahangir, A., O'Yang, C., Smith, S., Srinivasan, D., Ford, A. P., and Jett, M. F. (2006) *Br J Pharmacol* **147**, 335-345
8. Capehart, A. A., and Biddulph, D. M. (1991) *J Cell Physiol* **147**, 403-411
9. Machwate, M., Harada, S., Leu, C. T., Seedor, G., Labelle, M., Gallant, M., Hutchins, S., Lachance, N., Sawyer, N., Slipetz, D., Metters, K. M., Rodan, S. B., Young, R., and Rodan, G. A. (2001) *Mol Pharmacol* **60**, 36-41
10. Ng, J., Fredholm, B. B., Jondal, M., and Andersson, T. (1988) *Biochim Biophys Acta* **971**, 207-214
11. McCall, D. (1987) *Circulation* **75**, V3-14
12. Bleasdale, J. E., Bundy, G. L., Bunting, S., Fitzpatrick, F. A., Huff, R. M., Sun, F. F., and Pike, J. E. (1989) *Adv Prostaglandin Thromboxane Leukot Res* **19**, 590-593
13. Mintz, I. M., Venema, V. J., Swiderek, K. M., Lee, T. D., Bean, B. P., and Adams, M. E. (1992) *Nature* **355**, 827-829
14. Kristipati, R., Nadasdi, L., Tarczy-Hornoch, K., Lau, K., Miljanich, G. P., Ramachandran, J., and Bell, J. R. (1994) *Mol Cell Neurosci* **5**, 219-228
15. Kasai, H., Aosaki, T., and Fukuda, J. (1987) *Neurosci Res* **4**, 228-235
16. Xi, Q., and Angus, J. A. (2001) *Naunyn Schmiedebergs Arch Pharmacol* **364**, 430-436
